# Supplementary material
Source: publisher figshare collection journal article supplement (https://frontiersin.figshare.com/ndownloader/files/18721364)
Supplement: Supplementary file 1 [file 18721364]

## Sheet: Pig barn litter
					NH3 emission								Excretion	NH3 emission	NH3 emission	NH3 emission	NH3 emission	NH3 emission	NH3 emission		NH3 emission
Animal cat.			Litter	Country	Used for Guidebook EF	Litter	EUROSTAT, LU	Article, LU	Excretion Velthof	Guidebook			article yellow estimated	NH3	NH3	NH3	NH3	Ann Em	NH3	No of buildings	Used for Guidebook EF	Comments	JW	Current GB	NH3	Reference
					%TAN	kg pig-1 d-1	heads/LU	Heads/LU	kg N/(head*year)	TAN in pct of Ntot			g Total-N/(pig*d)	g pig−1 day−1	g m−2 day−1	(g LU−1 day−1)	(g m−2 day−1)	kg NH3-H/Y	%TAN-excreted		%TAN		%TAN	%TAN	%N-excreted
Gestating sows			Straw	Belgium	24.1429	0.92				0.7			44.5	9.05	3.6				24.1429	1	24.1429		25		16.9	Philippe et al. 2011b
Gestating sows			Straw partly, feeding area	Belgium	14.7001					0.7									14.7001	1	14.7001				10.2901	Phillip et al. 2013
Gestating sows			Straw full, feeding area	Belgium	11.8615					0.7				7.45					11.8615	1	11.8615				8.30303	Phillip et al. 2013		Emission pct. Calculated in percent of N excreted
Dry sow house			Straw	England	33.2455	2		2.17391		0.7			44			31.8			33.2455	1	33.2455		35			Dore et al. (2004)		England
Gestation sows			Slatted floor	Belgium	23.5937			2.59067	10.1	0.7			44.5			27.2			23.5937	1	23.5937					Philippe et al. (2015)
Gestation sows			Slatted floor	Belgium	38.8787			2.1097		0.7			44.5			36.5			38.8787	1	38.8787					Philippe et al. (2015)
Sows			Litter part	EU				2.59067	10.1	0.7			71.6871	19.212		47.904						Not used: Problems with calculating excreta production	20			Groot Koerkamp 1998b
Sows	Median				23.8683																23.8683			25
Sows	Ave				24.4037																24.4037
Sows	SD				10.3913																10.3913
Sows	Weighted mean				24.4037															6	24.4037
Weaned pigs			Straw	Belgium	26.8375	0.09		21.7391		0.7			3.24706	0.61	1.37				26.8375	1	26.8375		9.1		18.7862	Cabaraux et al. (2009)	Sven used the emission in pct. Of excreted N given by authors to calculate EF
Weaned pigs			Wood shavings	Belgium	47.261	0.31		21.7391		0.7			1.6625	0.55	1.24				47.261	1	47.261		8.2		33.0827	Cabaraux et al. (2009)
Weaned pigs			Straw	Belgium	24.2857	5.74		20.3252		0.7			9.95238	1.21					24.2857	1	24.2857				17	Nicks et al. (2003)
Weaned pigs			Wood shavings	Belgium	8.57143			20.1613		0.7			9.95238	0.46					8.57143	1	8.57143		5.2		6	Nicks et al. (2003)
Weaned pigs	Median				25.5616																25.5616
Weaned pigs	Ave				26.7389																26.7389
Weaned pigs	SD				15.8875																15.8875
Weaned pigs	Weighted mean				26.7389															4	26.7389
Fattening pigs			Straw	England	9.1	0.571429										0.82			9.1	1	9.1				6.4	Gilespy et al. 2009
Fattening pigs			Straw	England	7.6	1.14286										0.67			7.6	1	7.6				5.3	Gilespy et al. 2009
Fattening pigs			Straw	England		0.71	3.33333		10.6	0.7			29.0411	27.2	17							Not used Data collected from review in an article				Balsdon et al. (2000) - Data retrieved from Philippe et al. (2011a)
Fattening pigs			Saw chavings	France			3.33333		16.5	0.7			45.2055	3.5	2.9				5.4197			Not used Data collected from abstract				Kermarrec and Robin (2002) - from abstract
Fattening pigs			Straw	Poland	11.449	2	3.33333		13.6	0.7			37.2603	6.09418	4.3				11.449	1	11.449	Not used Data collected from abstract				Kavolelis (2006) from abstract
Fattening pigs			Straw	Belgium	31.5759	0.39	3.33333		10.6	0.7			29.0411	13.1	10.9				31.5759	1	31.5759					Philippe et al. (2007)
Fattening pigs			Straw	Belgium	32.8052		3.33333		10.6	0.7			29.0411	13.61					32.8052	1	32.8052					Nicks et al. (2004) From abstract
Fattening pigs			Wood shavings	Belgium	29.3102		3.33333		10.6	0.7			29.0411	12.16					29.3102	1	29.3102					Nicks et al. (2004) From abstract
Fattening pigs			Straw-deep litter	Belgium	33.5345					0.7									33.5345	1	33.5345			31.7	23.4742	Philippe et al. (2012)
Fattening pigs			Straw-flow	Belgium	38.3275					0.7									38.3275	1	38.3275			37.1	26.8293	Philippe et al. (2012)
Fattening pigs			Litter	EU	14.5201		3.33333		10.6	0.7			29.0411	6.024		62.16			14.5201	4	14.5201			9.2		Groot Koerkamp et al. 1998b
Fatening pigs			Litter	EU	13.514		3.33333		12.1	0.7			33.1507	6.4					13.514	1	13.514					Web et al. 2012
Finishers			Litter	At	20.7612						11.9	8.33		2.1				1.72941	20.7612	1	20.7612					Amon et al. 2007
Finishers	12 h		Litter	At	18.784						11.9	8.33		1.9				1.56471	18.784	1	18.784					Amon 2008
Finishers			Litter	Bel	41.6355						14.8	10.36		14.35				4.31344	41.6355	1	41.6355					Philippe et al., 2006
Finishers			Litter	Bel	41.0069						11.1	7.77		10.6				3.18624	41.0069	1	41.0069					Philippe et al., 2006
Finishers	Median				25.0357																25.0357
	Ave				24.566																24.566
Finishers	SD				12.2194																12.2194
Finishers	Weighted mean				22.7932															15
All Pigs >8kg	Median				25.5616																25.5616
All Pigs >8kg	Ave				25.0489																25.0489
All Pigs >8kg	Weighted mean				23.5448															19	#REF!
NOT USED
Finishers	NA		Litter	Korea				17C	straw/saw	NA	12.6	8.82		2				0.601176	6.81606			Not used Korean pig production systems may differ from EU systems
			Fermented rice straw&bran saw chavings	China		ND								2.16

## Sheet: Pig barn slats-holes
											Article	Article	Article
	Slat	Country	Season	Used for Guidebook EF	EUROSTAT, LU	Article, LU	Excretion Velthof or guidebook(comment guidebook)	N Excr	TAN excr	Guidebook	Excretion	Excretion	Excretion	NH3	NH3	NH3 (		Ann Em	NH3 %TAN-excreted	Number of buildings measured	Used for Guidebook EF	NH3 % N-excreted	Paper						Ref
				%TAN	heads/LU	Heads/LU	kg N/(head*year)	Kg N/year	Kg N/year	TAN in pct of Ntot	kg/(d*animal)	TAN, g/(d*pig)	Total-N, g/(d*pig)	(g pig−1 day−1)	(g m−2 day−1)	g LU−1 day−1)	Tot kg	kg NH3-H/Y			%TAN
Gestating sows	15% & 2.5%	Belgium		29.0929							4.84	54.24	117.6	15.78					29.0929	1	29.0929		Philippe et al. (2016)
Gestating sows	0.15	Belgium		42.5092							3.7	29.97	75.48	12.74					42.5092	1	42.5092		Philippe et al. (2016)
Gestating sows	0.158	Belgium		34.1429						0.7	43.9		43	12.77					34.1429	1	34.1429	23.9	Philippe et al. (2011)
Lact sows	Slurry	Ire	13C	30.5166				19.7	13.79					14				4.20824	30.5166	4	30.5166		Hayes 2006
Lact sows	Slurry	Fra		53.106				20.7	14.49					25.6				7.69506	53.106	1	53.106		Guignand 2003
Gest sows	Slurry	Ire	13C	33.2448				15.5	10.85					12				3.60706	33.2448	4	33.2448		Hayes 2006
Sows	slats	EU			2		34			0.7			93.1507	12.558					13.4814			13.4814	Groot Koerkamp et al. (1998b)
Sows		Median		33.6938																	33.6938
Sows		Ave		37.1021																	37.1021
Sows		SD		9.12703																	9.12703
Sows		Weighted mean		34.4914																12	34.4914
Weaned pigs	37 %, plastic	Belgium		9.70177						0.7			4.56471	0.31	1.21				9.70177	1	9.70177	6.79124	Cabaraux et al. (2009)							Excretion data from article
Weaned pigs	37%, plastic	Belgium		12.9788						0.7			3.9625	0.36	1.41				12.9788	1	12.9788	9.08517	Cabaraux et al. (2009)							Excretion data from article
Weaned pigs	Slats	EU data	Winter and Summer	8.60357	37.037					0.7	4.4			0.726		24.264			8.60357	4	8.60357	6.0225	Groot Koerkamp et al. (1998b)
Weaners	Slurry	Ire	13C	48.0263				3.8	2.66					4.25				1.2775	48.0263	4	48.0263		Hayes 2006
Weaners	Slurry	Bel		13.6734				3.8	2.66					1.21				0.363712	13.6734	1	13.6734		Nicks et al. (2003)
Weaners	Slurry	Fra		44.9732				4	2.8					3.45				1.25925	44.9732	1	44.9732		Guingand 2003
Weaned pigs		Median		13.6734																	13.6734
Weaned pigs		Ave		24.6355																	24.6355
Weaned pigs		SD		18.3338																	18.3338
Weaned pigs		Weighted mean		25.6539																12	25.6539
Fattening pigs		England			3.33333		10.6			0.7			29.0411	14.8	24.7								Balsdon et al. (2000)
Fattening pigs		France		21.1732	3.33333		16.5			0.7			45.2055	6.7	10				21.1732		21.1732	14.8212	Kermarrec and Robin (2002)
Fattening pigs		Poland		27.6902	3.33333		13.6			0.7			37.2603	7.22222	9.2				27.6902	2	27.6902	19.3832	Kavolelis (2006)
Fattening pigs		Belgium		19.5931	3.33333		16.5			0.7			45.2055	6.2	8.3				19.5931	1	19.5931	13.7152	Philippe et al. (2007)
Fattening pigs	slats	EU	Winter and Summer	34.2929	3.33333		10.6			0.7			29.0411	6.97133		57.804			34.2929	4	34.2929	24.0051	Groot Koerkamp et al. (1998b)
Fattening pigs	Partly slatted	Sweden	Winter and Summer	26.1287		4.54545	9.1			0.7			24.9315	4.56		68.88			26.1287	1	26.1287	18.2901	Ngwabie et al. (2011a)
Fattening pigs	35% slatted floor	Denmark	Winter		3.33333		8.4			0.7			23.0137			60.96				1			Blanes-Vidal et al. (2008)
Fattening pigs	Fully slatted floor	Belgium	Winter and Summer	34.5749			10.1			0.7			27.6712	6.69711					34.5749	3	34.5749	24.2024	Van Ransbeeck et al. (2013)
Fattening pigs	Fully slatted floor	Belgium	Winter and Summer	25.1454			10.1			0.7			27.6712	4.87062					25.1454	3	25.1454	17.6018	Ransbeeck et al. 2013
Fattening pigs	Partly slatted floor	Denmark	summer and winter	25.538		4.34783					18.0124	24		4.6					25.538	2	25.538		Zong et al. (2015)
Fattening pigs	Slatted floor - High fiber	Belgium		18.2775		4.58716	10.1			0.7						23.2			18.2775	1	18.2775		Philippe et al. (2015)
Fattening pigs	Slatted floor control	Belgium		38.054		4.2735	10.1			0.7						45			38.054	1	38.054		Philippe et al. (2015)
Finishers	Slurry	Bel	Indoor	10.3426				11.9	8.33								134.4	0.861538	10.3426	1	10.3426		Dekock 2009
Finishers	Slurry	Ger	Indoor	9.90723				14.8	10.36								110.85	1.02639	9.90723	1	9.90723		Dekock 2009
Finishers	Slurry	US	Ave - 13C	11.0566				14.9	10.43					25.075				1.1532	11.0566	1	11.0566		Blunden 2008
Finishers	Slurry	Ire	13C	39.5022				13.2	9.24					10				3.65	39.5022	4	39.5022		Hayes 2006
Finishers	Slurry			35.6372				13.9	9.73					9.5				3.4675	35.6372	1	35.6372		Guingand, 2003
Finishers	Part slat	Italy		13.7034				18.2	12.74			5.808						1.74582	13.7034	1	13.7034		Fabbri 2002
Finishers	Full slat	Italy		15.2323				18.2	12.74			6.456						1.9406	15.2323	1	15.2323		Fabbri 2002
Fattening pigs	Slatted floor	Median		25.1454																	25.1454
Fattening pigs		Ave		23.8735																	23.8735
Fattening pigs	Slatted floor	SD		10.0259																	10.0259
Fattening pigs		Weighted mean		26.8528																29	26.8528
All Pigs >8kg		Median		21.1732																	21.1732
All Pigs >8kg		Ave		23.6438																	23.6438
All Pigs >8kg		Weighted mean		26.5019																41	26.5019
NOT USED
Fattening pigs (Breeding)	Scraping	China	Winter and summer											5	2.3	39.55													Xu et al (2014)

## Sheet: Poultry barn
				NH3 emission						NH3 emission	NH3 emission	NH3 emission	NH3 emission	NH3 emission	NH3 emission		NH3 emission	NH3 emission
Category	System	Country	Season	Used for Guidebook EF	Excretion Velthof	Guidebook	Excretion, Webb	Excretion, Webb	Excretion, Webb	NH3	NH3			NH3	NH3 emission	No of buildings	Used for Guidebook EF	NH3 emission	Ref
				% of TAN	kg N/(head*year)	TAN fraction of Ntot	TAN, g N/D	kg Ntot/(poultry*Y)	Kg NH3-N/(poultry*Y)	(mg poultry−1 day−1)	(g LU-1 day-1 or AU−1 day−1)	g poultry-1 year-1	NH3 g/(d*bd)	(g m−2 day−1)	% N-total		% of TAN	%N-excreted
Layer house	Manure belt	Spain		10		1				115.7					7	1	10	7	Alberdi et al. (2016)	AU
Layer house	Aviary house low removal frequence			22.9429	0.6	1				264					16.06	4	22.9429	16.06	Groot Koerkamp et al. (1998)
Layer house	Manure belt, weekly remove	England	Summer	21.7792	0.57	1				238.08	76.8				15.2455	1	21.7792	15.2455	Nicholson et al. (2004)	One chicken weight 1.55 kg
Layer house	Manure belt, weekly remove	England	Winter	9.52842	0.57	1				104.16	33.6				6.66989	1	9.52842	6.66989	Nicholson et al. (2004)
Layer house	Manure belt, daily remove	England	Year (Ave)	22.4598	0.57	1				245.52	79.2				15.7219	1	22.4598	15.7219	Nicholson et al. (2004)
Layer house	Manure belt, daily remove	England	Year (Ave)	8.84782	0.57	1				96.72	31.2				6.19347	1	8.84782	6.19347	Nicholson et al. (2004)
Layers	Multilevel system	Nor		46.5196			0.504	0.72		0.78		0.234459			32.5637	1	46.5196		Nimmark et al. (2009)
Layers	Furnished cages	Nor		4.47304			0.504	0.72		0.075		0.0225441			3.13113	1	4.47304		Nimmark et al. (2009)
Layer house	Manure belt	Ireland	Spring	5.83177	0.76	1				100					5.83177	1	8.3311	5.83177	Hayes et al. (2006)
Layers	Floor housing	Nor					0.504	0.72		2.1		0.631235			87.6716				Nimmark et al. (2009)
Layer house	Deep litter	Ireland	Summer	37.2449	0.85	1				500					26.0714	1	37.2449	26.0714	Hayes et al. (2006)
Layers	Belt dried and removed	Nl		18.3441			0.6734	0.962				0.123529			12.8409	3	18.3441		Dekker 2011
Layers	Belt removed	It		26.3608			0.5061	0.723		162		0.133412			18.4525	1	26.3608		Fabbri 2007
Layer	Median			20.0617											15.2455		20.0617
	Ave			19.7											19.4964		19.736
	SD			12.7											22.1802		12.6928
Layers	Weighted mean			20.1												17	20.1382		Weighted mean
Layer house	Deep pit	England		55.8093	0.57	1				610.08	196.8				39.0665	1	55.8093	39.0665	Nicholson et al. (2004)
Layers	Deep pit	It		26.3608			0.5061	0.723		162		0.133412			18.4525	1	26.3608		Fabbri 2007
Layer house	Deep pit liquid	EU		73	0.6	1				840	221.912				51.1	4	73	51.1	Groot Koerkamp et al. (1998b)
Layer house	Median			55.8093											39.0665		55.8093
Layer house	Ave			51.7234											36.2064		51.7234
Layer house	SD			23.5866											16.5106		23.5866
Layers	Weighted mean			93.5425												6	62.3617		Weighted mean
Broiler (Winter)	Straw	England		13.612	0.57	1				148.8	48				9.52842	1	13.612	9.52842	Nicholson et al. (2004)	AU = 500 kg animal
Broiler (Winter)	Woodshavings)	England		6.80602	0.57	1				74.4	24				4.76421	1	6.80602	4.76421	Nicholson et al. (2004)
Broiler (Winter)	Rice hulls, Winter	Portugal	Winter	8.47321	0.8	1				130	22				5.93125	3	8.47321	5.93125	Pereira (2017)
Broilers	Litter	EU	Summer and winter	30.4514	0.6	1				350.4	118.188				21.316	4	30.4514	21.316	Groot Koerkamp et al. (1998b)
Broilers		Spain	Winter	33.9658			0.308	0.44				0.104615	19.75		23.776	1	33.9658		Calvet 2011
Broilers		Spain	summer	31.1109			0.308	0.44				0.0958217	18.09		21.7777	1	31.1109		Calvet 2011
Broilers		Czeck	Year	21.4286			0.308	0.44				0.05			15	1	21.4286		Knitzatov 2011
Broilers		Ire	Winter	10.1357			0.364	0.52				0.0368941	0.16		7.09502	1	10.1357		Hayes 2006
Broilers		Ire	Spring	19.0045			0.364	0.52				0.0691765	0.3		13.3032	1	19.0045		Hayes 2006
Broilers		Ire	Summer	31.6742			0.364	0.52				0.115294	0.5		22.1719	1	31.6742		Hayes 2006
Broilers		Fra	Winter 1 cycle	20.511			27.79	39.7		5.7		5.7			14.3577	1	20.511		Guiziou, 2005
Broilers	Median			20.511											14.3577		20.511
Broilers	Av			20.6521											14.4565		20.6521
Broilers	SD			10.0384											7.02686		10.0384
Broilers	Weighted mean			20.9671												16	20.9671		Weighted mean
Turkeys	Litter	Ire	Winter	14.0507		0.7		2.11	1.477			0.207529	0.9		9.83552	1	14.0507		Hayes et al. 2006
Turkeys	Litter	Ire	Winter	10.9284		0.7		2.11	1.477			0.161412	0.7		7.64985	1	10.9284		Hayes et al. 2006
Turkeys	Median			12.4895											8.74268		12.4895
Turkeys	Av			12.4895											8.74268		12.4895
Turkeys	SD			2.20786											1.5455		2.20786
Turkeys	Weighted mean			12.4895												2	12.4895
NOT USED, conditions not similar to those in EU
Layer house	Caged	USA									17899
Broiler+A51:Y52	Cage,	South Korea									5058			0.33						AU
Broiler	Cage,	South Korea									6272			0.376						AU
Broilers	Litter	Canada	Summer and winter		0.6	1				248.775	80.25				15.1338			15.1338		AU=500 kg
Broilers	Litter	USA	Summer and winter		0.6	1				501.489					30.5073			30.5073
Turkeys	US		year			0.7		1.44	1.008			0.368941	1.6		36.6013
Layer house	Multilevel system, weekly remove scraping	China	Year (Ave)							129	33.4
Layer house	Cage+manure belt	South Korea									2.15			0.129
Layer house	Manure belt standard removal	USA								860										From abstract not used
Layer house	Manure belt daily or twice a week removal	USA								74										From abstract not used
Layer house	Cage and manure belt	USA	Year ave'		0.6	1				280					17.0333			17.0333
Layer house	Cage and manure belt, Conventional	USA	Year ave'							82	25.95
Layer house	Cage and manure belt, enriched colony	USA	Year ave'							54	17.45
Layer house	Cage belt natural drying	Canada			0.6	1				58.0822		21.2			3.53333			3.53333
Layer house	Cage belt forced drying	Canada			0.6	1				43.2877		15.8			2.63333			2.63333
Layer house	Deep pit liquid	Canada		64.8333	0.6	1				1065.75		389			64.8333		64.8333	64.8333

## Sheet: Cattle barn_Slurry
				Used for Guidebook EF	EUROSTAT, LU	Article, LU	Excretion Velthof	Excretion, Webb	Excretion	Article Excretion	Excretion (Velthof yellow)		Excretion, Webb	NH3	NH3	NH3	NH3	NH3	NH3-N		Number of buildings measured	Used for Guidebook EF	Comments	NH3	Reference
Animal category	Slurry removal system	Season	Country	%TAN	heads/LU	Heads/LU	kg N/(head*year)	N-tot, g N/(d*cattle)	kg/(d*animal)	gN LU-1 d-1	N, g/(d*cattle)	TAN as a fraction of N-total	TAN, g N/(d*cattle)	g cattle−1 day−1	g m−2 day−1	g LU−1 day−1	g HPU-1 d-1	(g m−2 day−1)	%TAN-excreted			%TAN		%N-excreted
Dairy cow	Scraper	All year	Germany	18.3606		1	132				361.644	0.6		39.84		39.84			18.3606		4	18.3606		11.0164	Saha et al. (2014)
Dairy cow	Scraping to pit	All year	Germany									0.6		7.1
Dairy cow	Scraping	All year	USA									0.6				24.4									ADVIENTO-BORBE et al. (2010)
Dairy cattle	Slurry	annual	Por			%N	165												20				Not used: measurements carried out at a scale model of 1 m2	12	Pereira et al., 2010
Dairy cattle	Slurry	annual	Por			%N	130												3.14286				Not used: measurements carried out at a scale model of 1 m2	2.2	Pereira et al., 2010
Dairy cattle	Slurry	annual	Por			%N	118												1.16667				Not used: measurements carried out at a scale model of 1 m2	0.7	Pereira et al., 2010
Dairy cattle	Slurry	max	Fin			g NH3 cow d		347					208.2	177.5					70.2096				Not used: Peat was used in the building a special case		Teye and Hautala, 2008
Dairy cattle	Slurry	min	Fin			g NH3 cow d		347					208.2	12.2					4.82568				Not used: Peat was used in the building a special case		Teye and Hautala, 2008
Dairy cow	Scraping	Spring faall	Canada	6.50917		1	120				328.767	0.6		12.84		12.84			6.50917		1	6.50917		3.9055	Ngwabie et al. (2014)			LU=500kg
Dairy cattle	Slurry	summer	Ger	22.902		g NH3 /LU/h	126									43.2			22.902		2	22.902			Fiedler, Muller, 2011
Dairy cattle	Slurry	summer	Ger	52.1656		g NH3 /LU/h	126									98.4			52.1656		2	52.1656			Fiedler, Muller, 2011
Dairy cattle	Slurry	summer	CH	43.9252		g NH3/LU/d	110									56.8			43.9252		6	43.9252			Schrade et al., 2010
Dairy cattle	Slurry	Summer	US			g NH3 cow d		470					282	6.58					1.92157				Not used: Building was fluxhed every 4 h		Mukthar, et al., 2009
Dairy cattle	Slurry	summer	US	36.0494			180												36.0494		1	36.0494			Rumburg et al., 2008		80	N/185 cows/d
Dairy cattle	Slurry, scraped hourly	winter	Swe			g/LU/h	175									19.44			10.0861				Not used building was scraped ourly		Ngwabie et al., 2011b
Dairy cattle	Slurry	winter	CH	9.53211		g NH3/LU/d	110									12.7			9.53211		6	9.53211			Schrade et al., 2010
Dairy cattle	Slurry, flushed*4	Winter	US			g NH3 cow d		470					282	4.67					1.36379				Not used: Building was fluxhed every 4 h		Mukthar, et al., 2009
Dairy cattle	Slurry	winter	Swe	10		%N	130												10		1	10		6	Ngwabie et al., 2009		Special unit
Dairy cattle	Slurry	winter	US	4.50617			180												4.50617		1	4.50617			Rumburg et al., 2008		10	N/185 cows/d
Dairy cow	Scraping	Winter	Germany	26.5559	1		127				347.945	0.6		55.44		55.44			26.5559		4	26.5559		15.9335	Snell et al. 2003			LU=500 kg, problems with conversin to %of TAN
Dairy cow	Slatted floor	winter - summer	Denmark			1	138				378.082	0.6					11.13								Rong et al. (2014)		Promblems with conversion from HPU
Dairy cow	Bedding peat, scraper	Winter spring	Sweden							400		0.6		23.52		0.81							Not used special case	4	Ngwabie et al. (2011b)
Dairy cow	Scraping	Winter spring early summer	Sweden	9.33333	1							0.6				24.24			9.33333		1	9.33333		5.6	Ngwabie et al. (2009)
Dairy cow	EU average	winter summer	EU	16.0202	1		110				301.37	0.6		33.318		28.968			16.0202		4	16.0202		9.61211	Groot Koerkamp et al. 1998b
Dairy cow	Slatted floor, insulated		Poland	20.2778			87				238.356	0.6		29					20.2778		1	20.2778		12.1667	Kavolelis (2006)		from abstract
Dairy cow	Slated floor, uninsolated		Poland	11.887			87				238.356	0.6		17					11.887		1	11.887		7.13218	Kavolelis (2006) from abstract
Dairy cow	Scraping to slurry pit		England	46.3492		0.952381	110				301.37	0.6		83.8095		88			46.3492		1	46.3492		27.8095	Dore et al. (2004)
Dairy cow		throughout yr	Estonia	12.3056		1.2	87				238.356	0.6		17.5987		14.6656			12.3056		1	12.3056		7.38337	Maaksimeets et al. 2015
Dairy cow	Slurry		Por			%N																	Not used: measurements carried out at a scale model of 1 m2	27	Pereira et al., 2011
Dairy cow	Slurry		Por			%N																	Not used: measurements carried out at a scale model of 1 m2	66	Pereira et al., 2011
Dairy cow	Slurry	Median		17.1904																MEDIAN(V3:V32,V52,V54)		17.1904
Dairy cow	Slurry	Av		21.6674																AVERAGE(V3:V32,V52,V54)		21.6674
Dairy cow	Slurry	SD		15.1764																STDEV(V3:V32,V52,V54)		15.1764
Dairy cow	Slurry	Weighted mean		19.3743																SUM(V3:V32,V52,V54)	45	19.3743
Below is calculated a weighted average taking outdoor grazing into account																							20
Dairy cow	Cattle outdoor summer	Winter av		12.658																VERAGE(V17:V26)		12.658
Dairy cow	Cattle outdoor summer	Summer av		38.7605																AVERAGE(V12:V16)		38.7605
Dairy cow	Cattle outdoor summer	Weighted ave.		19.1836																((V36*3)+((V36/2)+(V37/2))*3)/6		19.1836
Dairy cow	Tied		Poland	20.2778			87				238.356	0.6		29					20.2778		1	20.2778		12.1667	Kavolelis (2006)		from abstract
Dairy cow	Tied , scrapers and gutter	Winter	Sweden	9.16667			126					0.6		24					9.16667		1	9.16667		5.5	Gustafson et al. (2005)
Dairy cow	Tied		Austria	3.63746	1		97				265.753	0.6		5.8		5.8			3.63746		1	3.63746		2.18247	Amon et al. (2001)
Dairy cow	Tied		Germany	3.19605	1		132				361.644	0.6		6.935		6.935			3.19605		1	3.19605		1.91763	Oldenburg (1989)		- Data from Amon et al. (2001)
Dairy cow	Tied	Median		6.40206															9.06949			6.40206	6.6
Dairy cow	Tied	Av		9.06949																		9.06949
Dairy cow	Tied	SD		7.95067															7.95067			7.95067
Dairy cow	Tied	Weighted mean		9.06949																	4	9.06949
Not included in calculations too few measurements
Beef	Slatted floor	winter summer	EU	17.228			60				164.384	0.6		12.896		16.992			17.228		4	17.228	20	10.3368	Groot Koerkamp et al. 1998b
Calves	Slatted floor	winter summer	EU	35.8308			60				164.384	0.6		10.14		35.34			35.8308		4	35.8308	20	21.4985	Groot Koerkamp et al. 1998b
																									Mean

## Sheet: Cattle barn litter
					NH3 emis				Velthof (Yellow)				NH3 emis	NH3 emis		NH3 emis					References
Livestock category	Cattle	Litter	Country	Season	Used for Guidebook EF	EUROSTAT , LU	Velthof et al.	Litter kg cattle-1 d-1	Total N inexcreta, g animal-1 day-1	Guidebook	NH3 ()		NH3 (g LU−1 day−1)	%TAN-excreted	Number of buildings measured	Used for Guidebook EF	Comments	Current	%N-excreted	N-unaccounted, % Ntot
				d	%TAN					TAN in pct of Ntot	g cattle−1 day−1	g cattle-1 year-1	litter			%TAN		%TAN
Cattle no dairy	Small	Straw	England	Summer	11.5	1		3.5					13.8	11.5	1	11.5	Used: standard straw addition		6.9	14	Gilespy et al. 2009
Cattle no dairy	Small	Straw	England			1		4.655					7.1	5.6			Not used: Non standard straw addition		3.4	18	Gilespy et al. 2009
Cattle no dairy	Small	Straw	England			1		5.81					7.6	6.1			Not used: Non standard straw addition		3.6	22	Gilespy et al. 2009
Cattle no dairy	Small	Straw	England			1		7					6.8	5.4			Not used: Non standard straw addition		3.3	22	Gilespy et al. 2009
Cattle no dairy	Large	Straw	England	Winter		1		4.655					30.4	22.4			Not used excretion mis calculation large cattle		13.5	-17	Gilespy et al. 2009
Beef cattle		Litter	EU		4.93745	1	110		301.37	0.6	8.928		10.908	4.93745	4	4.93745			2.96247		Groot Koerkamp et al. 1998b
Beef cattle		Litter	EU		6.63636	1	110		301.37	0.6	12		12	6.63636	1	6.63636			3.98182		Web et al. (2012)
Cattle no dairy	Litter		Median		6.63636											6.63636		19
Cattle no dairy			Av		7.69127											7.69127
Cattle no dairy	Litter		SD		3.40608											3.40608
Cattle no dairy			Weighted mean		6.31436										6	6.31436
Dairy cow	Low N in feed	Sawdust	France	Controlled env. High temp	18.3929	1			224	0.6			24.72	18.3929	1	18.3929			11.0357		Edouard et al. (2016)
Dairy cow	High N in feed	Sawdist	France	Controlled env. High temp	12.3153	1			406	0.6			30	12.3153	1	12.3153			7.38916		Edouard et al. (2016)
Dairy cow	Deep litter	straw	The Netherland	Averager of winter and summer (Outdoor grazing)	15.3281	1	127		347.945	0.6	32	13900		15.3281	1	15.3281			9.19685		Mosquera et al. 2006
Dairy cow	Litter straw	straw	Austria	Summer and winter	3.63746	1	97		265.753	0.6	5.8		5.8	3.63746	1	3.63746			2.18247		Amon et al.(2001)
Dairy cow	Deep litter sawdusr				6.66667	1				0.6				6.66667	1	6.66667			4		Kaasik et al. (2004)
Dairy cow	Straw		Austria		8.97825	1	97		265.753	0.6	14.316		12.648	8.97825	1	8.97825			5.38695		Amon et al. See Webb et al. 2012
Dairy cow		Litter	EU		2.66804	1	127		347.945	0.6	5.57			2.66804	4	2.66804			1.60083		Groot Koerkamp et al. 1998b
Dairy cow	Litter		EU		17.1439	1	110		301.37	0.6	31		31	17.1439	1	17.1439			10.2864		Web et al. (2012)
Dairy cow	Litter		Median		10.6468											10.6468		19
Dairy cow	Litter		Av		10.6413											10.6413
Dairy cow	Litter		SD		6.07488											6.07488
Dairy cow	Litter		Weighted m		5.47851										17	5.47851
Calves		Litter	EU		3.54739	1	83		227.397	0.6	4.84		17.904	3.54739		3.54739		19	2.12843

## Sheet: References
Peer reviewed articles	reports	Proceeding Articles	References
1			ADVIENTO-BORBE M.A.A., WHEELER E.F., BROWN N.E., TOPPER P.A., GRAVE, R.E., ISHLER V.A., VARGA G.A. Ammonia and greenhouse gas flux from manure in freestall barn with dairy cows on precision fed rations. Transactions of the ASABE 53 (4), 1251, 2010.
1			Alberdi O., Arriaga H., Calvet S., Estellès F., Merino P. 2016 Ammonia and greenhouse gas emissions from an enriched cage laying hen facility. Biosystems Engineering 144, 1-12.
1			Amon B., Amon T., Boxberger J., Alt C. 2001. Emissions of NH3, N2O and CH4 from dairy cows housed in a farmyard manure tying stall (housing, manure storage, manure spreading). Nutrient Cycling in Agroecosystems. 60, 103-113.DOI: 10.1023/A:1012649028772
1			Amon B, Kryvoruchko V, Fröhlich M, Amon T, Pöllinger A, Mösenbacher I, Hausleitner A, 2007. Ammonia and greenhouse gas emissions from a straw flow system for fattening pigs: Housing and manure storage. Livestock Science 112, 199–207.
			Amon et al. 2008 . Finishers
		1	Balsdon, S.L., Williams, J.R., Southwood, N.J., Chadwick, D.R., Pain, B.F., Chambers, B.J., 2000. Ammonia fluxes from solid and liquid manure management systems for beef cattle and pigs. In: Sangiorgi, F. (Ed.), Proceedings of the 9th International Conference on the FAO ESCORENA Network on Recycling of Agricultural, Municipal and Industrial Residues in Agriculture. Gargano, Italy, 6–9 September. …
1			Blanes-Vidal V., Hansen M.N., Pedersen S., Rom H.B. 2008. Emissions of ammonia, methane and nitrous oxide from pig houses and slurry: Effects of rooting material, livestock activity and ventilation flow. Agriculture, Ecosystems and Environment 124, 237.
1			Blunden J., Aneja V.P. and Overton J.H. 2008. Modeling hydrogen sulfide emissions across the gas– liquid interface of an anaerobic swine waste treatment storage system. Atmos. Environ. 42, 5602– 5611. doi:10.1016/j.atmosenv.2008.03.016
1			Cabaraux, J.F., Philippe, F.X., Laitat, M., Canart, B., Vandenheede, M., Nicks, B., 2009. Gaseous emissions from weaned pigs raised on different floor systems. Agriculture Ecosystems & Environment 130, 86–92.
1			Calvet, S., Cambra-López, M., Estellés, F., Torres, A.G. 2011. Characterization of gas emissions from a Mediterranean broiler farm. Poultry Science 90, 534-542.
1			Dekker, S.E.M., Aarnink, A.J.A., de Boer, I.J.M., Groot Koerkamp, P.W.G. 2011. Emissions of ammonia, nitrous oxide, and methane from aviaries with organic laying hen husbandry. Biosystems Engineering 110, 123-2133.
1			Dekock J, Vranken E, Gallmann E, Hartung E, Berckmans D. 2009. Optimisation and validation of the intermittent measurement method to determine ammonia emissions from livestock buildings. Biosystems Engineering 104, 396 – 403.
1			Dore C.J. , Jones B.M.R., Scholtens R., in't Veld J.W.H.H. , Burgess L.R., Phillips V.R. 2004. Measuring ammonia emission rates from livestock buildings and manure stores - part 2: Comparative demonstrations of three methods on the farm. Atmospheric Environment. 38, 3017-3024. DOI: 10.1016/j.atmosenv.2004.02.031
1			Edouard, N.; Hassouna, M.; Robin, P.; et al. 2016. Low degradable protein supply to increase nitrogen efficiency in lactating dairy cows and reduce environmental impacts at barn level LIVESTOCK Volume: 10 Issue: 2 Pages: 212-220 Published: FEB 2016
		1	Fabbri C, Valli L, Bonazzi G, 2002. Ammonia emissions from two different flooring systems for heavy pigs. pp. 267-271 In: Proceedings of the 10th International Conference of the RAMIRAN network, (Venglovský, J., Gréserová, G., Eds), May 14-18, Štrbské Pleso, Slovak Republic.
1			Fabbri, C., Valli, L. Guarino, M., Mazzotta, V. 2007. Ammonia, methane, nitrous oxide and particulate matter emissions in two different buildings for laying hens. Biosystems Engineering 97, 441-455.
1			Fiedler, A.M., Müller, H.-J. 2011. Emissions of ammonia and methane from a livestock building natural cross ventilation. Meteorologische Zeitschrift 20, 059-065.
1			Groot Koerkamp P, Metz J, Uenk G, Phillips V, Holden M, Sneath R, Short J, White R, Hartung J and Seedorf J. 1998. Concentrations and emissions of ammonia in livestock buildings in Northern Europe. J Agric Eng Res; 70: 79–95.
1			Groot Koerkamp P. W. G. ; Speelman L.; Metz J. H. M. 1999b. Litter Composition and Ammonia Emission in Aviary Houses for Laying Hens: Part II, Modelling the Evaporation of Water. J. Agric. Engng Res.. 73, 353-362
1			Groot Koerkamp P. W. G., Speelman L., Metz J. H. M. 1998a. Litter Composition and Ammonia Emission in Aviary Houses for Laying Hens. Part 1: Performance of a Litter Drying System. J. agric. Engng Res. 70, 375Ð382
1			Groot Koerkamp P.W.G. 1994. Review on emissions of ammonia from housing systems for laying hens in relation to sources, processes, building design and manure handling. J. Agric. Res. 59, 73–87.
1			Groot Koerkamp, P.W.G., Metz, J.H.M., Uenk, G.H., Phillips, V.R., Holden, M.R., Sneath, R.W., Short, J.L., White, R.P., Hartung, J., Seedorf, J., Schröder, M., Linkert, K.H.,Pedersen, S., Takai, H., Johnsen, J.O., and Wathes, C.M. 1998b. Concentrations and emissions of ammonia in livestock buildings in Northern Europe. Journal of agricultural Engineering Research, 70, 79-95.
		1	Guingand N. 2003. Air quality and reduction of slatted floor in growing-finishing pig units. In Proc. International Symposium on Gaseous and Odour Emissions from Animal Production Facilities. Horsens. June 1st-4th. Denmark: 80-87.
1			Guiziou F, Beline F. 2005. In situ measurement of ammonia and greenhouse gas emissions from broiler houses in France. Bioresource Technology 96, 203–207.
1			Hayes E.T., Curran T.P., Dodd V.A. 2006. Odour and ammonia emissions from intensive poultry units in Ireland. Bioresource Technology 97, 933–939.
1			Kaasik A; Leming R; Remmel T (2002). Nutrient losses (N, P, K) in dairy- and pig production. Agraarteadus, 13(4), 201–211,(Data from Ngwabie et al. 2009)
1			Kavolelis, B., 2006. Impact of livestock housing systems on ammonia emission rates. Polish Journal of Environmental Studies 15, 739–745.
1			Kermarrec, C., Robin, P., 2002. Nitrogenous gas emissions during the rearing of pigs on sawdust litter. Journées de la Recherche Porcine 34, 155–160.
			Knitzatov 2011. Poultry barn?
			Maaksimeets et al. 2015 - Cattle barn slurry
1			Ngwabie N.M., Jeppsson K-H, Gustafsson G. Nimmark S. 2011b. Effects of livestock activity and air temperature on methane and ammonia emissions from a naturally ventilated building for dairy cows. Atmospheric Environment 45, 6760-6768.
1			Ngwabie N.M., Jeppsson K-H, Nimmark S., Gustafsson G. 2011a. Effects of livestock and climate parameters on gas emissions from a barn for fattening pigs. Applied Engineering in Agriculture 27, 1027, 2011a (From abstract and from PhD thesis of Ngwabie N.M. )
1			Ngwabie N.M., Jeppsson K-H, Nimmark S., Swensson C., Gustafsson G. 2009.Multilocation measurements of greenhouse gases and emission rates of methane and ammonia from a naturally-ventilated barn for dairy cows. Biosystems Engineering 103, 68, 2009
1			Ngwabie N.M., Vanderzaag A., Jayasundara S., Wagner-Riddle C. 2014. Measurements of emission factors from a naturally ventilated commercial barn for dairy cows in a cold climate. Biosystems Engineering 127, 103.
1			Nicholson F, Chambers B and Walker A. 2004. Ammonia emissions from broiler litter and laying hen manure management systems. Biosys Eng; 89: 175–185.
1			Nicks B, Laitat M, Farnir F, Vandenheede M, Désiron A, Verhaeghe C, Canart B. 2004. Gaseous emissions from deep-litter pens with straw or sawdust for fattening pigs. Animal Science 78, 99-107.
1			Nicks B, Laitat M., Vanderheede M., Désiron A., Verhaege C., Canart B. 2003. Emissions of ammonia, nitrous oxide, methane, carbon dioxide and water vapor in the raising of weaned pigs on straw-based and sawdust-based deep litters. Anim. Res. 52, 299–308
	1		Oldenburg J (1989) Geruchs- und Ammoniak-Emissionen aus der Tierhaltung. KTBL-Schrift 333, Kuratorium für Landtechnik und Bauwesen in der Landwirtschaft e.V., Darmstadt (Data from Amon et al. 2001)
1			Pereira, J., Fangueiro D., Misselbrook, T. H., Chadwick, D. R., Coutinho, J., & Trindade, H. (2011). Ammonia and greenhouse gas emissions from slatted and solid floors in dairy cattle houses: A scale model study. Biosystems Engineering, 109, 148-157.
1			Pereira, J., Misselbrook, T. H., Chadwick, D. R., Coutinho, J., & Trindade, H. (2010). Ammonia emissions from naturally ventilated dairy cattle buildings and outdoor concrete yards in Portugal. Atmospheric Environment, 44, 3413-3421.
1			Philippe F-X, Laitat M, Canart B, Farnir F, Massart L, Vandenheede M, Nicks B, 2006. Effects of a reduction of diet crude protein content on gaseous emissions from deep-litter pens for fattening pigs. Anim. Res. 55, 397–407.
1			Philippe F-X, Laitat M, Canart B, Vandenheede M, Nicks B, 2007. Comparison of ammonia and greenhouse gas emissions during the fattening of pigs, kept either on fully slatted floor or on deep litter. Livestock Science 111, 144–152.
1			Philippe, F.X., Laitat. M., Nicks, B. Cabaraux, J.F. 2012. Ammonia and greenhouse gas emissions during the fattening of pigs kept on two types of straw floor. Agriculture, Ecosystems and Environment 150, 45-53.
1			Philippe, F-X., Cabaraux, J.F., Nicks, B. 2011. Ammonia emissions from pig houses: Influencing factors and mitigation techniques. Agriculture, Ecosystems and Environment 141, 245–260.
1			Philippe F. X., Laitat M., Wavreille J., Nicks B. 2016.Floor slat openings impact ammonia and greenhouse gas emissions associated with group-housed gestating sows. Livestock Volume 10, 2027-2033. https://doi-org.ez.statsbiblioteket.dk:12048/10.1017/S1751731116000938
1			Philippe F. X., Laitat M., Wavreille J., Nicks B., Cabaraux J. F. 2013. Influence of permanent use of feeding stalls as living area on ammonia and greenhouse gas emissions for group-housed gestating sows kept on straw deep-litter. Livestock Science. 155, 397-406. DOI: 10.1016/j.livsci.2013.05.005
1			Philippe F. X., Laitat, M., Nicks B., Cabaraux J.F. 2012. Ammonia and greenhouse gas emissions during the fattening of pigs kept on two types of straw floor. Agriculture, Ecosystems and Environment 150, 45, 2012.
1			Philippe F.-X., Laitat M., Wavreille J., Nicks B., Cabaraux J.-F. 2015. Effects of a high-fibre diet on ammonia and greenhouse gas emissions from gestating sows and fattening pigs. Atmospheric Environment, 109, 197-204
1			Rumburg, B., Mount, G.H., Filipy, J., Lamb, B., Westberg, H., Yonge, D., Kincaid, R., Johnson, R. 2008. Measurement and modeling of atmospheric flux of ammonia from dairy milking cow housing. Atmospheric Environment 42, 3364–3379.
1			Saha C.KL., Ammona C., Berga W., Fiedler M., Loebsin C., Sanftleben P., Brunsch R., T. Amon T. 2014. Seasonal and diel variations of ammonia and methane emissions from a naturally ventilated dairy building and the associated factors influencing emissions. Science of the Total Environment 468–469, 53–62 B.V. All rights reserved.http://dx.doi.org/10.1016/j.scitotenv.2013.08.015
1			Schrade, S., Keck, M., Zeyer, K., Emmenegger, L., Hartung, E. 2010. Comparison of ammonia emissions from a naturally ventilated dairy loose housing with solid floor surfaces over two seasons. CIGR XVIIth World Congress – Québec City, Canada – June 13-17, 2010.
1			Snell H.G.J., Seipelt F., Van Den Weghe H.F.A. 2003. Ventilation Rates and Gaseous Emissions from Naturally Ventilated Dairy Houses. Biosystems Engineering 86, 67-73.
			Teye and Hautala, 2008. Cattle barn
1			Van Ransbeeck N., Van Langenhove H., Demeyer P. 2013. Indoor concentrations and emissions factors of particulate matter, ammonia and greenhouse gases for pig fattening facilities. Biosystems engineering 116, 518 – 528.
1			Xu W., ZHENG K., LIU X., MENG L., HUAITALLA R. M., SHEN J., HARTUNG E.,GALLMANN E., ROELCKE M., ZHANG F. 2014. Atmospheric NH3 dynamics at a typical pig farm in China and their implications. Atmospheric Pollution Research. 5, 455-463
1			Zong C., Li H. and Zhang G. 2015. Ammonia and greenhouse gas emissions from fattening pig house with two types of partial pit ventilation systems. Agric., Ecosys. Environ. 208, 94–105. http://dx.doi.org/10.1016/j.agee.2015.04.031
48	1	3
